# Supplementary material for: Fixed Amidst Change: 20 Years of Media Coverage on Carbon Capture and Storage in Germany
Source: MDPI journal article supplement (doi:10.3390/su14127342), 2022-06-15
Supplement: s1 [file s1]

Archive with 1 entries (1 files):
- sustainability-1742527-supplementary.pdf
