# Supplementary material for: Fixed Amidst Change: 20 Years of Media Coverage on Carbon Capture and Storage in Germany
Source: MDPI journal article supplement (doi:10.3390/su14127342), 2022-06-15
Supplement: s1 [file s1 › sustainability-1742527-supplementary.pdf]

## Supplementary Materials

Table S1. Codebook.

| Categories            | Subcategories                                                       | Definitions                                                                                                                                                                                               |
|-----------------------|---------------------------------------------------------------------|-----------------------------------------------------------------------------------------------------------------------------------------------------------------------------------------------------------|
| 1 Potentials CCS      |                                                                     | Text passages receive this code if they discuss the potentials of CCS. These potentials can be various and concern, amongst others, energy security, increase of employment or climate change mitigation. |
|                       | 1.1 Economic potential                                              |                                                                                                                                                                                                           |
|                       | 1.2 Climate change mitigation potential                             |                                                                                                                                                                                                           |
| 2 Risks CCS           |                                                                     | Text passages receive this code if they discuss risks of CCS. This can concern e.g.: risks for human health or the environment, economic risks or the risk of delaying other climate change initiatives.  |
|                       | 2.1 Health risks                                                    |                                                                                                                                                                                                           |
|                       | 2.2 Prolonging fossil fuel use                                      |                                                                                                                                                                                                           |
|                       | 2.3 Economic risks                                                  |                                                                                                                                                                                                           |
|                       | 2.4 Impact on region                                                |                                                                                                                                                                                                           |
|                       | 2.5 Environmental risks                                             |                                                                                                                                                                                                           |
| 3 Insecurities CCS    |                                                                     | Code for text passages that report on insecurities concerning CCS. Such insecurities can be economic, political or legal or they can relate to geological storage capacities or other technical issues.   |
|                       | 3.1 Storage capacity                                                |                                                                                                                                                                                                           |
|                       | 3.2 Long term effects regarding health and security                 |                                                                                                                                                                                                           |
|                       | 3.3 Legal feasibility                                               |                                                                                                                                                                                                           |
|                       | 3.4 Contribution to climate change mitigation/impact on environment |                                                                                                                                                                                                           |
|                       | 3.5 Political feasibility                                           |                                                                                                                                                                                                           |
|                       | 3.6 Economic feasibility                                            |                                                                                                                                                                                                           |
|                       | 3.7 Technical feasibility                                           |                                                                                                                                                                                                           |
| 4 Representations CCS |                                                                     | This code collects metaphors and narratives that are used to represent CCS in the news media reports.                                                                                                     |
|                       | 4.1 Other metaphors                                                 |                                                                                                                                                                                                           |
|                       | 4.2 Hope/technology of the future                                   |                                                                                                                                                                                                           |
|                       | 4.3 Science fiction/insecure feasibility                            |                                                                                                                                                                                                           |
|                       | 4.4 Bridging technology                                             |                                                                                                                                                                                                           |

|                    |                                     |                                                                                                                                                                                                            |
|--------------------|-------------------------------------|------------------------------------------------------------------------------------------------------------------------------------------------------------------------------------------------------------|
|                    | 4.5 Danger                          |                                                                                                                                                                                                            |
|                    | 4.6 Placebo                         |                                                                                                                                                                                                            |
|                    | 4.7 Underground                     |                                                                                                                                                                                                            |
|                    | 4.8 Nuclear waste/nuclear energy    |                                                                                                                                                                                                            |
|                    | 4.9 Waste                           |                                                                                                                                                                                                            |
|                    | 4.10 „Clean coal“                   |                                                                                                                                                                                                            |
|                    | 4.11 Technical description CCS      |                                                                                                                                                                                                            |
| 5 Applications CCS |                                     | Text passages receive this code if they describe or discuss applications of CCS.                                                                                                                           |
|                    | 5.1 Negative emissions technologies |                                                                                                                                                                                                            |
|                    | 5.2 DACCS                           |                                                                                                                                                                                                            |
|                    | 5.3 Blue hydrogen                   |                                                                                                                                                                                                            |
|                    | 5.4 Research pilot sites            |                                                                                                                                                                                                            |
|                    | 5.5 (Enhanced) oil recovery         |                                                                                                                                                                                                            |
|                    | 5.6 Residual emissions industry     |                                                                                                                                                                                                            |
|                    | 5.7 Fossil fuel power plants        |                                                                                                                                                                                                            |
|                    | 5.8 Bioenergy and CCS               |                                                                                                                                                                                                            |
| 6 Political debate |                                     | This code captures the political debates on CCS. Text passages that report on positions for or against CCS receive this code. It is also used to code all actors that do or say something in the articles. |
|                    | 6.1 Pro arguments                   |                                                                                                                                                                                                            |
|                    | 6.2 Con arguments                   |                                                                                                                                                                                                            |
|                    | 6.3 Actors                          |                                                                                                                                                                                                            |

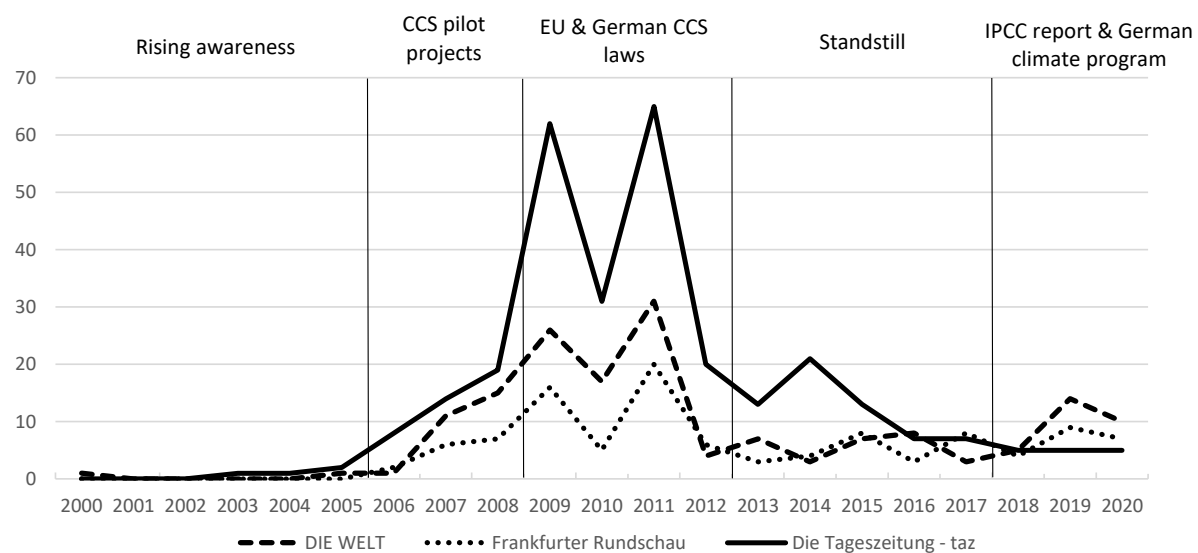

**Figure S1.** Article numbers per year (sample 2 – DIE WELT, Frankfurter Rundschau, Die Tageszeitung – taz; N=571).
